# Supplementary material
Source: PubMed Central journal article supplement (PMC6808347)
Supplement: JSLHR-62-3554-s001.pdf [file JSLHR-62-3554-s001.pdf]

**Supplemental Material S1.** Item parameter estimations and fit statistics for the full CIQOL-item bank for development of the CIQOL-35 Profile instrument.

| CIQOL-35             | Item stem (items in final item bank)                                                 | Item parameters |                | Fit statistics |            |             |             |
|----------------------|--------------------------------------------------------------------------------------|-----------------|----------------|----------------|------------|-------------|-------------|
|                      |                                                                                      | Difficulty      | Discrimination | Infit MnSq     | Infit Zstd | Outfit MnSq | Outfit Zstd |
| <i>Communication</i> |                                                                                      |                 |                |                |            |             |             |
| X                    | Follow conversation in a group of 5                                                  | 2.44            | 1.00           | .99            | .0         | 1.02        | .3          |
|                      | Understand announcements from public address (PA) systems                            | 1.91            | .82            | 1.16           | 2.2        | 1.16        | 1.9         |
|                      | Understand whisper                                                                   | 1.65            | .90            | 1.09           | 1.2        | 1.08        | 1.0         |
| X                    | Understand strangers without lip reading in a noisy place                            | 1.52            | 1.09           | .94            | -.8        | .91         | -1.2        |
|                      | Understand someone speaking from another room                                        | 1.51            | .95            | 1.04           | .6         | 1.02        | .3          |
|                      | Understand in a noisy place without lip reading                                      | 1.50            | 1.21           | .84            | -2.3       | .81         | -2.5        |
| X                    | Conversation in a noisy place without asking for repeat                              | 1.13            | 1.37           | .67            | -5.2       | .66         | -5.1        |
|                      | Conversation with 3+ people in a noisy place                                         | 1.02            | 1.07           | .96            | -.5        | .94         | -.8         |
| X                    | Understand conversation in a crowded room                                            | .90             | 1.31           | .73            | -4.1       | .71         | -4.3        |
|                      | Understand someone speaking behind me                                                | .77             | 1.18           | .85            | -2.2       | .84         | -2.3        |
| X                    | Ask a lot of questions about what is being said                                      | .69             | 1.12           | .85            | -2.2       | .97         | -.4         |
|                      | Tell direction from where someone is talking <sup>a</sup>                            | .48             | .51            | 1.46           | 5.5        | 1.52        | 6.0         |
|                      | Follow what one person is saying when surrounded by noise                            | .31             | 1.10           | .89            | -1.5       | .89         | -1.5        |
|                      | Follow the conversation when switching from one person to another in a group         | .27             | 1.14           | .89            | -1.5       | .86         | -1.9        |
|                      | Understand strangers without lip reading                                             | .03             | 1.15           | .90            | -1.4       | .86         | -1.8        |
| X                    | Hear and understand without looking                                                  | -.07            | 1.36           | .67            | -5.0       | .66         | -5.1        |
| X                    | Conversation without asking for repeat                                               | -.26            | 1.36           | .67            | -5.0       | .67         | -4.7        |
|                      | Understand someone without reading lips                                              | -.32            | 1.07           | .97            | -.4        | .95         | -.6         |
| X                    | Conversation with 3+ people                                                          | -.62            | 1.21           | .82            | -2.6       | .79         | -2.8        |
|                      | Other people's voices sound clear                                                    | -.97            | 1.20           | .84            | -2.2       | .79         | -2.6        |
|                      | Spoken language sounds clear                                                         | -1.09           | 1.20           | .84            | -2.2       | .80         | -2.5        |
| X                    | Other people's voices sound clear and natural                                        | -1.14           | .84            | 1.20           | 2.5        | 1.13        | 1.4         |
|                      | Able to adapt my voice <sup>a</sup>                                                  | -1.19           | .64            | 1.30           | 3.6        | 1.34        | 3.6         |
|                      | Able to differentiate speech from noise <sup>a</sup>                                 | -1.33           | .54            | 1.43           | 5.1        | 1.74        | 6.9         |
|                      | What I hear sounds natural <sup>a</sup>                                              | -1.37           | .61            | 1.39           | 4.7        | 1.35        | 3.6         |
|                      | Conversation with 3+ people in quiet <sup>a</sup>                                    | -1.96           | .79            | 1.26           | 3.2        | 1.59        | 4.7         |
| X                    | Conversation in quiet without asking for repeat                                      | -2.01           | .89            | 1.10           | 1.3        | 1.14        | 1.3         |
|                      | Clearly hear own voice <sup>a</sup>                                                  | -3.82           | .41            | 1.91           | 8.1        | 1.37        | 1.7         |
| <i>Emotional</i>     |                                                                                      |                 |                |                |            |             |             |
| X                    | Frustrated when cannot follow conversation                                           | 1.78            | .94            | 1.03           | .4         | 1.04        | .6          |
| X                    | Keep quiet in conversation to avoid saying wrong thing                               | 1.10            | .92            | 1.06           | .8         | 1.06        | .9          |
|                      | Hearing loss makes me feel less confident                                            | .70             | 1.22           | .84            | -2.4       | .81         | -2.6        |
|                      | Irritate people by asking for repeat <sup>a</sup>                                    | .67             | .76            | 1.14           | 1.9        | 1.21        | 2.6         |
|                      | Feel handicapped by hearing <sup>a</sup>                                             | .43             | .78            | 1.22           | 2.9        | 1.20        | 2.4         |
|                      | Hearing loss makes me feel anxious                                                   | .32             | 1.09           | .94            | -.8        | .95         | -.7         |
|                      | Hearing loss decreases self esteem                                                   | .11             | 1.05           | 1.03           | .4         | .95         | -.5         |
| X                    | Hearing loss makes me irritable                                                      | -.10            | 1.16           | .87            | -1.8       | .80         | -2.4        |
|                      | I am relaxed during conversation                                                     | -.23            | 1.08           | .86            | -1.9       | .91         | -1.0        |
|                      | Hearing causes me to be embarrassed when meeting new people                          | -.28            | 1.19           | .87            | -1.8       | .82         | -2.1        |
| X                    | Hearing loss makes me feel inadequate                                                | -.36            | 1.29           | .80            | -2.8       | .72         | -3.4        |
|                      | Confident in my responses during conversation                                        | -.42            | 1.06           | .85            | -2.1       | .89         | -1.2        |
|                      | Hearing loss makes me feel depressed                                                 | -.62            | 1.16           | .88            | -1.5       | 1.06        | .6          |
|                      | Embarrassed by hearing loss <sup>a</sup>                                             | -.63            | .55            | 1.50           | 5.6        | 1.50        | 4.4         |
| X                    | Feel comfortable being myself                                                        | -2.48           | .92            | 1.12           | 1.3        | .92         | -.3         |
| <i>Entertainment</i> |                                                                                      |                 |                |                |            |             |             |
|                      | Understand lectures, worship service, theaters without listening device <sup>a</sup> | .75             | .59            | 1.24           | 3.1        | 1.40        | 4.7         |
| X                    | Music sounds clear and natural                                                       | .71             | 1.11           | 1.00           | .0         | .95         | -.6         |
|                      | Clearly understand speech from radio and TV                                          | .67             | .94            | .96            | -.6        | 1.00        | .0          |
| X                    | Recognize melodies in music                                                          | .09             | 1.32           | .73            | -4.1       | .72         | -4.0        |
| X                    | Able to enjoy music                                                                  | -.25            | 1.05           | 1.09           | 1.2        | .97         | -.4         |
| X                    | Able to enjoy listening to radio and TV                                              | -.61            | 1.18           | .85            | -2.0       | .84         | -2.0        |
|                      | Recognize rhythms in music                                                           | -.64            | 1.00           | 1.04           | .6         | .96         | -.4         |
| X                    | Due to hearing loss, listen to TV less often than I like                             | -.71            | .89            | 1.16           | 2.0        | 1.06        | .7          |
| <i>Environment</i>   |                                                                                      |                 |                |                |            |             |             |
| X                    | Hear someone approach from behind                                                    | 1.29            | 1.25           | .78            | -3.3       | .78         | -3.3        |
|                      | Correctly locate source of sound <sup>a</sup>                                        | .62             | .77            | 1.21           | 2.7        | 1.21        | 2.7         |

| CIQOL-35                | Item stem (items in final item bank)                                       | Item parameters |                | Fit statistics |            |             |             |
|-------------------------|----------------------------------------------------------------------------|-----------------|----------------|----------------|------------|-------------|-------------|
|                         |                                                                            | Difficulty      | Discrimination | Infit MnSq     | Infit Zstd | Outfit MnSq | Outfit Zstd |
| X                       | Hear cars approaching in traffic                                           | -.18            | 1.13           | .90            | -1.3       | .86         | -1.9        |
| X                       | Distinguish sounds in nature                                               | -.34            | 1.40           | .62            | -5.8       | .62         | -5.8        |
| X                       | Everyday sounds sound natural                                              | -.95            | 1.01           | 1.07           | .9         | .98         | -.2         |
| X                       | Everyday sounds are clear                                                  | -1.03           | 1.31           | .74            | -3.7       | .68         | -4.3        |
| <i>Listening Effort</i> |                                                                            |                 |                |                |            |             |             |
| X                       | Have to concentrate during conversation with strangers in noisy place      | 2.47            | 1.20           | .81            | -2.6       | .76         | -2.1        |
|                         | Have to concentrate during conversation with friends/family in noisy place | 1.32            | 1.09           | .89            | -1.5       | .87         | -1.6        |
| X                       | Have to concentrate during conversation                                    | 1.04            | 1.12           | .92            | -1.2       | .90         | -1.2        |
| X                       | Easily have conversation in a noisy place                                  | .16             | 1.00           | 1.03           | .5         | 1.01        | .2          |
|                         | Tiring to listen <sup>a</sup>                                              | -.74            | .73            | 1.23           | 3.0        | 1.26        | 3.1         |
| X                       | Ignore competing sounds and focus on who is speaking                       | -1.19           | .98            | 1.00           | .1         | .97         | -.3         |
|                         | Stop following conversations due to fatigue                                | -1.44           | .83            | 1.15           | 2.0        | 1.13        | 1.6         |
| X                       | Takes minimal effort to follow conversation                                | -1.62           | 1.16           | .81            | -2.7       | .90         | -1.2        |
| <i>Social</i>           |                                                                            |                 |                |                |            |             |             |
| X                       | Feel left out in a group                                                   | 1.19            | 1.17           | .87            | -1.8       | .86         | -2.0        |
|                         | Avoid noisy places <sup>a</sup>                                            | 1.10            | .69            | 1.27           | 3.4        | 1.31        | 3.8         |
|                         | Hearing limits/hampers social life                                         | .73             | 1.18           | .89            | -1.5       | .85         | -2.1        |
|                         | Hearing loss causes me to want to be by myself <sup>a</sup>                | .61             | .76            | 1.24           | 3.0        | 1.26        | 3.1         |
|                         | Relationships negatively impacted <sup>a</sup>                             | .58             | .66            | 1.25           | 3.1        | 1.35        | 4.0         |
|                         | Withdraw in social situations                                              | .54             | 1.22           | .81            | -2.7       | .83         | -2.3        |
| X                       | Avoid social situations                                                    | .49             | 1.30           | .75            | -3.7       | .75         | -3.5        |
|                         | Appropriately answer questions in a group                                  | .13             | 1.11           | .83            | -2.4       | .94         | -.7         |
|                         | Tell someone's mood by tone of their voice <sup>a</sup>                    | .00             | .26            | 1.57           | 6.4        | 1.85        | 7.91        |
|                         | Always feel at ease in company                                             | -.12            | 1.30           | .68            | -4.7       | .68         | -4.0        |
| X                       | Hearing loss keeps me from socializing                                     | -.33            | 1.36           | .72            | -4.0       | .65         | -4.2        |
|                         | Avoid speaking with strangers                                              | -.33            | 1.00           | 1.04           | .5         | .96         | -.4         |
|                         | Feel part of mainstream society                                            | -.49            | 1.02           | 1.00           | .0         | .95         | -.5         |
| X                       | Have confidence to socialize                                               | -.59            | 1.25           | .78            | -3.0       | .72         | -3.0        |
| X                       | If interested, will join family/friends for social event                   | -1.72           | .96            | 1.11           | 1.2        | .97         | -.1         |
|                         | Able to start conversations                                                | -1.79           | .89            | 1.13           | 1.5        | 1.06        | .4          |

Note. <sup>a</sup>Item demonstrates misfit to the IRT model. "X" denotes selection for the CIQOL-35.
