# Supplementary material
Source: PubMed Central journal article supplement (PMC6808347)
Supplement: JSLHR-62-3554-s002.pdf [file JSLHR-62-3554-s002.pdf]

**Supplemental Material S2.** Item parameters and fit statistics for the CIQOL-35 Profile instrument for CIQOL-10 Global instrument development.

| CIQOL-10 | Item stem (items in CIQOL-35)                                         | Domain | Item parameters |                | Fit statistics |            |             |             |
|----------|-----------------------------------------------------------------------|--------|-----------------|----------------|----------------|------------|-------------|-------------|
|          |                                                                       |        | Difficulty      | Discrimination | Infit MnSq     | Infit Zstd | Outfit MnSq | Outfit Zstd |
| X        | Have to concentrate during conversation with strangers in noisy place | Lis    | 3.18            | .92            | 1.07           | .9         | 1.09        | .9          |
|          | Follow conversation in a group of 5                                   | Com    | 1.99            | 1.24           | .76            | -3.6       | .90         | -1.3        |
|          | Have to concentrate during conversation                               | Lis    | 1.94            | .89            | 1.11           | 1.6        | 1.08        | 1.0         |
| X        | Understand strangers without lip reading in a noisy place             | Com    | 1.26            | 1.18           | .85            | -2.1       | .84         | -2.3        |
|          | Easily have conversation in a noisy place                             | Lis    | 1.19            | 1.10           | .97            | -.5        | .92         | -1.1        |
|          | Frustrated when cannot follow conversation                            | Emo    | .99             | 1.00           | 1.00           | .0         | .99         | -.1         |
|          | Conversation in a noisy place without asking for repeat               | Com    | .97             | 1.47           | .57            | -7.1       | .57         | -7.0        |
| X        | Hear someone approach from behind                                     | Env    | .87             | .95            | 1.00           | .0         | 1.03        | .4          |
|          | Music sounds clear and natural <sup>a</sup>                           | Ent    | .79             | .36            | 1.62           | 7.3        | 1.57        | 6.6         |
|          | Understand conversation in a crowded room                             | Com    | .79             | 1.43           | .61            | -6.4       | .61         | -6.1        |
|          | Ask a lot of questions about what is being said                       | Com    | .62             | 1.30           | .68            | -5.0       | .72         | -4.2        |
| X        | Keep quiet in conversation to avoid saying wrong thing                | Emo    | .43             | 1.00           | .96            | -.5        | 1.12        | 1.5         |
|          | Feel left out in a group                                              | Soc    | .38             | 1.08           | .96            | -.5        | .92         | -1.0        |
|          | Recognize melodies in music                                           | Ent    | .19             | .81            | 1.18           | 2.4        | 1.17        | 2.1         |
|          | Ignore competing sounds and focus on who is speaking                  | Lis    | .06             | 1.13           | .84            | -2.2       | .87         | -1.7        |
| X        | Hear and understand without looking                                   | Com    | .05             | 1.35           | .70            | -4.6       | .68         | -4.7        |
|          | Conversation without asking for repeat                                | Com    | -.09            | 1.39           | .61            | -6.2       | .63         | -5.4        |
|          | Able to enjoy music <sup>a</sup>                                      | Ent    | -.14            | .12            | 1.90           | 9.8        | 1.80        | 8.2         |
|          | Avoid social situations                                               | Soc    | -.21            | 1.06           | .96            | -.6        | .95         | -.7         |
| X        | Takes minimal effort to follow conversation                           | Lis    | -.31            | 1.29           | .72            | -4.3       | .77         | -3.0        |
|          | Conversation with 3+ people                                           | Com    | -.37            | 1.39           | .66            | -5.2       | .65         | -4.9        |
|          | Hear cars approaching in traffic                                      | Env    | -.41            | .72            | 1.21           | 2.7        | 1.26        | 2.9         |
|          | Able to enjoy listening to radio and TV                               | Ent    | -.49            | .72            | 1.31           | 3.8        | 1.31        | 3.4         |
|          | Distinguish sounds in nature                                          | Env    | -.54            | 1.09           | .86            | -2.0       | .91         | -1.1        |
|          | Hearing loss makes me irritable                                       | Emo    | -.57            | .94            | 1.10           | 1.3        | 1.02        | .3          |
| X        | Due to hearing loss, listen to TV less often than I like              | Ent    | -.58            | .67            | 1.41           | 5.0        | 1.28        | 3.1         |
|          | Other people's voices sound clear and natural                         | Com    | -.77            | 1.01           | 1.04           | .6         | 1.00        | .0          |
|          | Hearing loss makes me feel inadequate                                 | Emo    | -.80            | .77            | 1.28           | 3.4        | 1.19        | 2.0         |
| X        | Hearing loss keeps me from socializing                                | Soc    | -.90            | 1.09           | 1.00           | .0         | .92         | -.9         |
|          | Everyday sounds sound natural                                         | Env    | -1.07           | .87            | 1.18           | 2.3        | 1.08        | .8          |
|          | Everyday sounds are clear                                             | Env    | -1.13           | 1.01           | 1.02           | .2         | .93         | -.7         |
|          | Have confidence to socialize                                          | Soc    | -1.13           | 1.09           | .97            | -.4        | .87         | -1.4        |
| X        | Conversation in quiet without asking for repeat                       | Com    | -1.44           | 1.03           | .91            | -1.1       | 1.07        | .7          |
|          | If interested, will join family/friends for social event              | Soc    | -2.12           | .95            | 1.19           | 2.2        | .97         | -.2         |
| X        | Feel comfortable being myself                                         | Emo    | -2.63           | .88            | 1.21           | 2.2        | 1.05        | .3          |

Note. <sup>a</sup>Item demonstrates misfit to the IRT model. "X" denotes selection for the CIQOL-10. Lis = listening effort; Com = communication; Emo = emotional; Env = environment; Soc = social; Ent = entertainment.
